# Supplementary material for: Polymorphisms in EGFR Gene Predict Clinical Outcome in Unresectable Non-Small Cell Lung Cancer Treated with Radiotherapy and Platinum-Based Chemoradiotherapy
Source: MDPI journal article supplement (doi:10.3390/ijms22115605), 2021-05-25

**Table S1.** The genotype distribution in 436 NSCLC patients.

| SNP       | Genotype | n (%)    | Allele           | Function class <sup>a</sup>           | Regulome DB rank <sup>b</sup> | MAF  |
|-----------|----------|----------|------------------|---------------------------------------|-------------------------------|------|
| rs2227983 | GG       | 231 (53) | Arg521Lys<br>G>A | NS; splicing<br>(ESE/ESS)             | 5                             | 0.26 |
|           | GA       | 171 (39) |                  |                                       |                               |      |
|           | AA       | 25 (6)   |                  |                                       |                               |      |
|           | Missing  | 9 (2)    |                  |                                       |                               |      |
| rs712830  | CC       | 289 (66) | -191 C>A         | promoter; TFBS;<br>splicing (ESE/ESS) | 4                             | 0.19 |
|           | CA       | 126 (29) |                  |                                       |                               |      |
|           | AA       | 21 (5)   |                  |                                       |                               |      |
| rs712829  | GG       | 211 (48) | -216 G>T         | promoter; TFBS;<br>splicing (ESE/ESS) | 2a                            | 0.30 |
|           | GT       | 191 (44) |                  |                                       |                               |      |
|           | TT       | 34 (8)   |                  |                                       |                               |      |

NSCLC, non-small cell lung cancer; SNP, single nucleotide polymorphism; MAF, minor allele frequency; NS, nonsynonymous; TFBS, transcription factor binding site; ESE/ESS, exonic splicing enhancer/exonic splicing silencer; <sup>a</sup> <https://www.regulomedb.org>; <sup>b</sup> <https://snpinfo.niehs.nih.gov/snpinfo/snpfunc.html>

**Figure S1.** Linkage disequilibrium (LD) analysis and haplotype block structure for three *EGFR* polymorphisms examined in the study—rs712830 (EGFR -216), rs712829 (EGFR -191) and rs2227983 (EGFR 521). The numbers represent the pairwise  $D'$  values expressed as percentages. The darkness of the cells indicates the strength of LD.

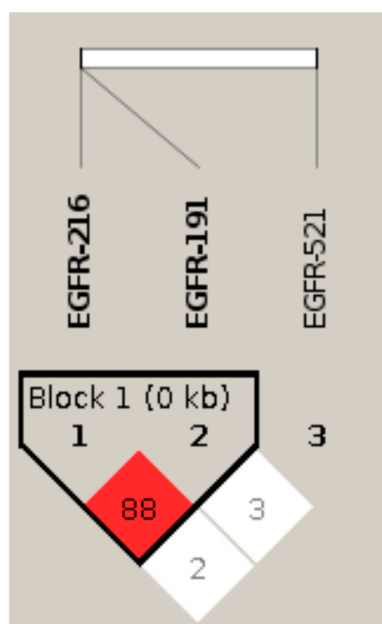

Supplement: s1 [file s1]
